# Supplementary material for: Measuring Women’s Experiences with Maternity Services: Development of a Feedback Tool in Malawi
Source: Research Square preprint supplement (doi:10.21203/rs.3.rs-7643760/v1), 2025-11-08
Supplement: Supplementary file 1 [file 9dbf6209e5d9fc9ca7f6798b.pdf]

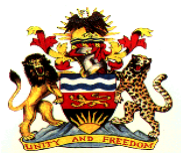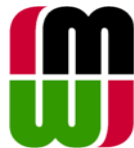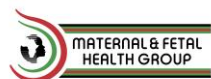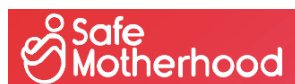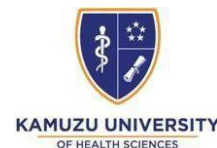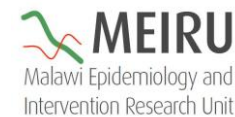

## MLW SAFE Motherhood Programme in Malawi

**Tuesday 4<sup>th</sup> February - Wednesday 5<sup>th</sup> February 2025, Ekhaya Luxury Resort, Mangochi, Malawi.**

**Objective of the Workshop:** 1. To validate maternity specific feedback tool

**Moderators:** MLW

| Time         | Activity                                                      | Presenter                                                                                  |
|--------------|---------------------------------------------------------------|--------------------------------------------------------------------------------------------|
| 8:30 – 9:00  | Registration                                                  | MLW team                                                                                   |
| 9:00 – 9:15  | Introductions and Opening Prayer                              | <ul style="list-style-type: none"> <li>MLW representative</li> </ul>                       |
| 9:15 – 9:45  | Opening Remarks                                               | <ul style="list-style-type: none"> <li>RHD Director</li> <li>QMD Director</li> </ul>       |
| 9:45 – 10:00 | Meeting Overview, safe motherhood programme                   | <ul style="list-style-type: none"> <li>Health system and policy specialist, MLW</li> </ul> |
| 10:00- 10:10 | Consenting                                                    | <ul style="list-style-type: none"> <li>MLW team</li> </ul>                                 |
| 10:10-10:30  | Presentation- Development of Maternity Specific Feedback tool | <ul style="list-style-type: none"> <li>Health system and policy specialist, MLW</li> </ul> |

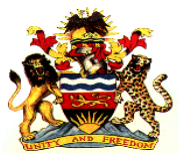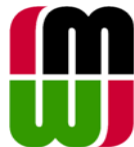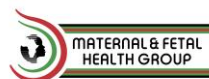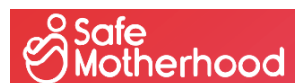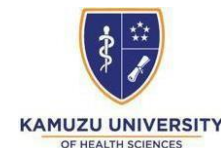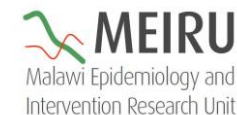

|               |                                  |                                                                          |
|---------------|----------------------------------|--------------------------------------------------------------------------|
| 10:30– 11:00  | <b>TEA BREAK AND GROUP PHOTO</b> |                                                                          |
| 11:00-11:10   | Group allocations                | <ul style="list-style-type: none"> <li>• MLW</li> </ul>                  |
| 11:10 – 13:30 | Group work and gallery walk      | <ul style="list-style-type: none"> <li>• Invited stakeholders</li> </ul> |
| 13:00 – 14:00 | <b>LUNCH</b>                     |                                                                          |
| 14:00 – 16:00 | Group work and gallery walk      | <ul style="list-style-type: none"> <li>• Invited stakeholders</li> </ul> |
| 16:00 – 16:10 | Closing remarks                  | <ul style="list-style-type: none"> <li>• RHD</li> </ul>                  |
| 16:10 – 16:15 | Closing Prayer                   | <ul style="list-style-type: none"> <li>• Volunteer</li> </ul>            |
| 16:15         | Tea Break and End of Meeting     |                                                                          |

## DAY TWO

|               |                                         |                                                           |
|---------------|-----------------------------------------|-----------------------------------------------------------|
| 8:30 – 9:00   | Registration                            | MLW team                                                  |
| 9:00 – 9:15   | Opening Prayer and Meeting Overview     | <ul style="list-style-type: none"> <li>• MLW</li> </ul>   |
| 9:15 – 9:35   | Presentations from Group leaders        | <ul style="list-style-type: none"> <li>• MLW</li> </ul>   |
| 9:35 – 10:30  | Discussion (Q and A)                    | <ul style="list-style-type: none"> <li>• Group</li> </ul> |
| 10:30 – 11:00 | Tea Break                               |                                                           |
| 11:00- 12:00  | Summary of key findings and way forward | Assoc Prof Linda Nyondo Mipando                           |

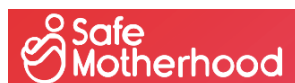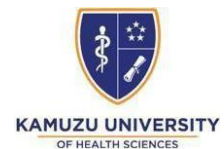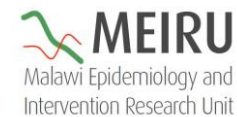

|             |                                                                            |                                                                         |
|-------------|----------------------------------------------------------------------------|-------------------------------------------------------------------------|
| 12:00-12:30 | Closing Remarks                                                            | <ul style="list-style-type: none"> <li>QMD and RHD Directors</li> </ul> |
| 12:30--     | <b>LUNCH and Departure of Invited Guests</b>                               |                                                                         |
| 14:00       | MLW Team Consolidates all materials and information and plan on next steps |                                                                         |
