# Supplementary material for: Measuring Women’s Experiences with Maternity Services: Development of a Feedback Tool in Malawi
Source: Research Square preprint supplement (doi:10.21203/rs.3.rs-7643760/v1), 2025-11-08
Supplement: Supplementary file 1 [file 234be2d44262e3019b6aba16.docx]

**Additional file 4: Composition of groups participated in Co-Design workshop**

| **Group** | **Role** | **Number** | **Organisation/Department** |
| --- | --- | --- | --- |
| One | Reproductive Health Officer | 1 | MoH-RHD |
| Deputy Director | 1 | MoH-QMD |
| Community member | 1 | Dowa community |
| Obstetrician | 1 | Central hospital |
| Safe motherhood Coordinator/midwife | 1 | District Office |
| Lecturer | 1 | KUHES Midwifery/researcher MLW |
| Nurse/Midwife Technician | 1 | Lilongwe Urban health centre |
| **Total** | **7** |  |
| Two | Researcher- Nurse/Midwife (facilitator) | 1 | MLW |
| Community member | 1 | Dowa Community |
| Nurse/Midwife Technician | 1 | Central Hospital |
| District Medical Officer | 1 | District Hospital |
| Safe Motherhood Coordinator/Midwife | 1 | District Hospital |
| Reproductive Health Officer | 1 | MoH-RHD |
| Nurse/Midwife Technician | 1 | MoH-District hospital |
| Obstetrician | 1 | MoH-Central hospital |
| **Total** | **8** |  |
| Three | Researcher- Social Scientist (Facilitator) | 1 | MEIRU |
| Community member | 1 | Dowa community |
| Clinician | 1 | District Hospital |
| District Nursing and Midwifery officer | 1 | Lilongwe district |
| CHAM Training representative | 1 | CHAM |
| Reproductive Health Officer | 1 | MoH-RHD |
| Nurse/Midwife Technician | 1 | Dowa -Rural hospital |
| Representative MUB | 1 | MUB |
| **Total** | **8** |  |
| Four | Researcher-Nurse/Midwife (facilitator) | 1 | MLW |
| Community Member | 1 | Dowa community |
| Nurse/Midwife Technician | 1 | Rural Health Centre |
| Clinician | 1 | MoH-District hospital |
| District Nursing and Midwifery Officer | 1 | MoH- District Hospital |
| Reproductive Health Officer | 1 | MoH-RHD |
| Lecturer | 1 | KUHES Midwifery/researcher MLW |
| Nurse/Midwife Technician | 1 | MoH-Health centre urban |
| **Total** | **8** |  |
| Five | Researcher- Nurse/Midwife | 1 | MLW |
| Nurse/Midwife Technician | 1 | Dowa district- Rural Facility |
| Lecturer | 1 | KUHES Midwifery/researcher MLW |
| Clinician | 1 | MoH-District Hiospital |
| Community Representative | 1 | Community Dowa district |
| Reproductive Health Officer | 1 | MoH-RHD |
| Local Organisation Representative | 1 | WRA |
| Training Institution -Midwifery | 1 | MCHS |
| **Total** | **8** |  |
| Six | Data Manager | 1 | MLW |
| Health System and Policy Researcher | 1 | MLW |
| Pre Service Training Officer | 1 | CHAM secretariate |
| AMREF Momentum representative | 1 | AMREF-Momentum |
| Hospital Ombudsman | 1 | Phalombe DHO |
| Quality Assurance -Zonal lead | 1 | MoH-QMD-SW |
| District Medical officer | 1 | MoH-District Hospital |
| **Total** | **7** |  |
