# Supplementary material for: Measuring Women’s Experiences with Maternity Services: Development of a Feedback Tool in Malawi
Source: Research Square preprint supplement (doi:10.21203/rs.3.rs-7643760/v1), 2025-11-08
Supplement: Supplementary file 2 [file 4b1a236d9f89ef14fc13fd67.docx]

**Additional file 5: Composition of groups participated in validation workshop**

| **Group** | **Role** | **Number** | **Organisation/Department** |
| --- | --- | --- | --- |
| One | Health System and Policy Researcher (Facilitator) | 1 | MLW |
| Reproductive Health Officer | 1 | MoH-RHD |
| Deputy Director | 1 | MoH-QMD |
| Nurse/Midwife Officer | 1 | Urban Health Centre |
| Lecturer | 1 | KUHES Midwifery |
| Representative people with disability- MACODA | 1 | MACODA |
| **Total** | **6** |  |
| Two | Researcher- Nurse/Midwife (facilitator) | 1 | MLW |
| QMD Zonal lead | 1 | MoH-QMD-NZ |
| Director | 1 | MoH-Nursing Directorate |
| Nurse/ Midwife | 1 | Rural Health center |
| HISP representative | 1 | HISP |
| Lecturer-CHAM training institution | 1 | Deayang Luke |
| **Total** | **6** |  |
| Three | Researcher- Social Scientist (Facilitator) | 1 | MEIRU |
| Deputy Director | 1 | MoH-RHD |
| QMD Zonal lead | 1 | MoH-QMD-CEZ |
| Nurse/Midwife Technician | 1 | District hospital |
| Hospital Ombudsman | 1 | CHAM District Hospital |
| Lecturer | 1 | Catholic University |
| **Total** | **6** |  |
| Four | Data Manager (facilitator) | 1 | MLW |
| Hospital Ombudsman | 1 | Urban Health Centre |
| Nurse/Midwife Officer | 1 | District Hospital |
| Association of Obstetricians and Gynecology | 1 | AOBG |
| QMD Zonal lead | 1 | MoH-QMD-SWZ |
| Nurse/Midwife Technician | 1 | Rural Health Centre |
| Lecturer | 1 | KUHES Midwifery/Researcher MLW |
| **Total** | **7** |  |
| Five | Researcher- Medical Doctor | 1 | MLW |
| Nurse/Midwife Technician | 1 | Urban Health Centre |
| QMD Zonal lead | 1 | MoH-QMD-SEZ |
| Hospital Ombudsman | 1 | Rural Health Centre |
| CHAM Representative-Secretariat | 1 | CHAM |
| Representative – People with disability-MUB | 1 | MUB |
| **Total** | **6** |  |
| Six | Community members representatives | 5 | Mangochi District |
| Researcher- Nurse/Midwife (facilitator) | 1 | MLW |
| **Total** | **6** |  |
