# Supplementary material for: Measuring Women’s Experiences with Maternity Services: Development of a Feedback Tool in Malawi
Source: Research Square preprint supplement (doi:10.21203/rs.3.rs-7643760/v1), 2025-11-08
Supplement: Supplementary file 3 [file c52f131439548c4abed851d5.pdf]

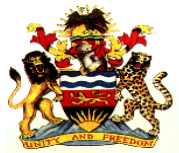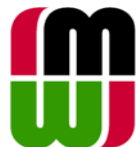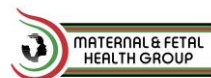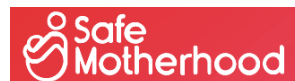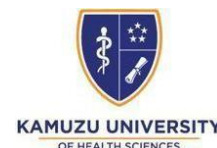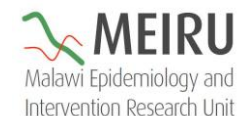

## SAFE Motherhood in Malawi

**Tuesday 2<sup>nd</sup> July- Wednesday 3<sup>rd</sup> July 2024, Linde Hotel, Mponela, Malawi.**

**Objective of the Workshop:** 1.To develop maternity specific feedback tool  
2.To decide on delivery modalities of the developed tool-to be piloted in some facilities in Malawi

**Moderators:** MLW, MoH-RHD and MoH QMD

### DAY ONE

| Time          | Activity                                                                     | Presenter                                                                                  |
|---------------|------------------------------------------------------------------------------|--------------------------------------------------------------------------------------------|
| 8:30 – 9:00   | Registration                                                                 | RHD/QMD/MLW team                                                                           |
| 9:00 – 9:15   | Introductions and Opening Prayer                                             | <ul style="list-style-type: none"> <li>Deputy Director MoH-QMD</li> </ul>                  |
| 9:15 – 9:45   | Opening session                                                              | <ul style="list-style-type: none"> <li>RHD Director</li> <li>QMD Director</li> </ul>       |
| 9:45 – 10:00  | Meeting Overview, safe motherhood programme + consenting                     | <ul style="list-style-type: none"> <li>Health System and Policy Specialist, MLW</li> </ul> |
| 9:50 – 10:10  | Presentation- relevance of maternity feedback tool in maternity services     | <ul style="list-style-type: none"> <li>Deputy Director MoH-RHD</li> </ul>                  |
| 10:10 – 10:30 | Presentation-relevance of maternity feedback tool as regards to quality care | <ul style="list-style-type: none"> <li>Deputy Director MoH-QMD</li> </ul>                  |

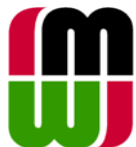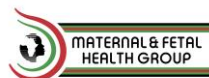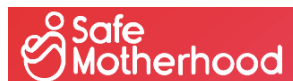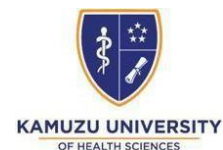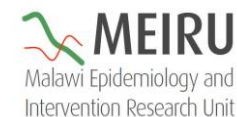

|               |                                                                                                                |                                                                                            |
|---------------|----------------------------------------------------------------------------------------------------------------|--------------------------------------------------------------------------------------------|
| 10:30 – 11:00 | Presentation-maternity specific satisfaction tools (designs, context, relevance, and applications)             | <ul style="list-style-type: none"> <li>Health System and Policy Specialist, MLW</li> </ul> |
| 11:00 – 11:30 | <b>TEA BREAK AND GROUP PHOTO</b>                                                                               |                                                                                            |
| 11:30-12:00   | Presentation from one Hospital Ombudsman on Satisfaction Experiences<br><br>Discussion on satisfaction reports | <ul style="list-style-type: none"> <li>Hospital Ombudsman-District Hospital</li> </ul>     |
| 12:00 – 13:00 | Group Allocations and Group work on content of the tools, Indicators of Importance Marketplace                 | <ul style="list-style-type: none"> <li>Invited stakeholders</li> </ul>                     |
| 13:00 – 14:00 | <b>LUNCH</b>                                                                                                   |                                                                                            |
| 14:00 – 15:00 | Presentation and discussion on the content and Important Indicators                                            | <ul style="list-style-type: none"> <li>Groups</li> </ul>                                   |
| 15:00 – 16:00 | Group work on type of tools (Paper based, electronic, apps etc- Gallery Walk                                   | <ul style="list-style-type: none"> <li>Group leads</li> </ul>                              |
| 16:00 – 16:10 | Closing remarks                                                                                                | <ul style="list-style-type: none"> <li>RHD</li> </ul>                                      |
| 16:10 – 16:15 | Closing Prayer                                                                                                 | <ul style="list-style-type: none"> <li>Volunteer</li> </ul>                                |
| 16:15         | Tea Break and End of Meeting                                                                                   |                                                                                            |

## DAY TWO

|             |                                     |                                                               |
|-------------|-------------------------------------|---------------------------------------------------------------|
| 8:30 – 9:00 | Registration                        | RHD/QMD/MLW team                                              |
| 9:00 – 9:15 | Opening Prayer and Meeting Overview | MLW representative                                            |
| 9:15 – 9:35 | Gallery walks                       | <ul style="list-style-type: none"> <li>Group leads</li> </ul> |

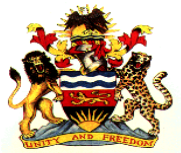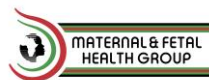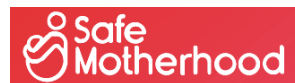

|               |                                                                            |                                                                                            |
|---------------|----------------------------------------------------------------------------|--------------------------------------------------------------------------------------------|
| 9:35 – 10:30  | Presentation on types of satisfaction tools-                               | <ul style="list-style-type: none"> <li>Group</li> </ul>                                    |
| 10:30 – 11:00 | Tea Break                                                                  |                                                                                            |
| 11:00- 12:00  | Summary of the content of the tools and types and final discussion         | MLW, RHD and QMD                                                                           |
| 12:00-12:30   | Closing Remarks and way forward                                            | <ul style="list-style-type: none"> <li>Health System and Policy Specialist, MLW</li> </ul> |
| 12:30--       | <b>LUNCH and Departure of Invited Guests</b>                               |                                                                                            |
| 14:00         | MLW Team Consolidates all materials and information and plan on next steps |                                                                                            |
