# Supplementary material for: Measuring Women’s Experiences with Maternity Services: Development of a Feedback Tool in Malawi
Source: Research Square preprint supplement (doi:10.21203/rs.3.rs-7643760/v1), 2025-11-08
Supplement: Supplementary file 4 [file 5bb24317171c625d85e02f11.docx]

**Additional file 1: List of stakeholders invited and attended co-design and validation workshops**

| **Institution/**  **Organisation type** | **Organisation name** | **No. Invited Co-design** | **No. attended Co-design** | **No. Invited Validation** | **No. attended Validation** |
| --- | --- | --- | --- | --- | --- |
| Ministry of Health and government divisions | Reproductive Health Directorate (RHD) | 5 | 5 | 3 | 3 |
| Quality Management Directorate (QMD) and Zonal leaders | 6 | 2 | 6 | 5 |
| Digital Health Division (DHD) | - | - | 1 | 0 |
| Health Information Systems Program (HISP) | - | - | 1 | 1 |
| Clinical Services Directorate | - | - | 1 | 0 |
| Nursing and Midwifery Directorate | - | - | 1 | 1 |
| **Total** | **11** | **7** | **13** | **10** |
| Training Institutions | Kamuzu University of Health Sciences (KUHeS), Obstetrics and Gynecology department | 1 |  | 1 | 0 |
| KUHeS (Midwifery department) | 1 | 1 | 1 | 1 |
| Christian Health Association of Malawi (CHAM)Training Institution-Deayang Luke | 1 | 1 | 1 | 1 |
| Catholic University of Malawi | - | - | 1 | 1 |
| Malawi College of Health Sciences | 1 | 1 | 1 | 1 |
| Mzuzu University of Malawi | - | - | 1 | 0 |
| **Total** | **4** | **3** | **7** | **4** |
| Professional Associations/  Organizations | Association of Malawi Midwives (AMAMI) | - | - | 1 | 0 |
| Association of Obstetrics and Gynecology Doctors in Malawi | - | - | 1 | 1 |
| Association of Obstetric Clinical Officers (AOCO) | - | - | 1 | 0 |
| **Total** | **0** | **0** | **3** | **1** |
| Community Reps | Maternal Health/Women Groups from communities | 5 | 5 | 5 | 5 |
| **Total** | **5** | **5** | **5** | **5** |
| Clinical Services | CHAM Health Services/Hospital | 1 | 1 | 1 | 1 |
| Midwives from rural/urban health centres, secondary and tertiary level facilities | 6 | 6 | 6 | 6 |
| Clinical officers from primary, secondary level facilities | 3 | 3 | - | - |
| Obstetricians from tertiary facility | 2 | 2 | - | - |
| District Nursing and Midwifery Officers (managers) | 2 | 2 | - | - |
| District Medical Officers (Managers) | 2 | 2 | - | - |
| Safe Motherhood Coordinators | 2 | 2 | - | - |
| Hospital Ombudsman | 1 | 1 | 3 | 3 |
| **Total** | **19** | **19** | **10** | **10** |
| Local NGOs | White Ribbon Alliance (WRA) | 1 | 1 | - | - |
| **Total** | **1** | **1** | **-** | **-** |
| Organizations of People with Disability | (Malawi Council for Disability Affairs (MOCODA_ | 1 | 0 | 1 | 1 |
| Malawi Union of Blind (MUB) | 1 | 1 | 1 | 1 |
| **Total** | **2** | **1** | **2** | **2** |
| Key Donor/international partners | UNICEF | - | - | 1 | 0 |
| WHO | 1 | 0 | 1 | 0 |
| UNFPA | 1 | 0 | 1 | 0 |
| GIZ | 1 | 0 | - | - |
| USAID (Momentum 1 and 2-AMREF) | 2 | 1 | 1 | 0 |
| PIH | 1 | 0 | - | - |
| **Total** | **6** | **1** | **4** | **0** |
| Research institution/Team | Malawi Liverpool Wellcome Research Programme (MLW) | 5 | 5 | 5 | 5 |
| Malawi Epidemiology & Intervention Research Unit (MEIRU | 1 | 1 | 1 | 1 |
| KUHES | 3 | 3 | 3 | 1 |
| Science Communication-Media-MLW | 1 | 1 |  |  |
| **Total** | **10** | **10** | **9** | **7** |
| **Grand Total** |  | **58** | **48 (83%)** | **53** | **39(74%)** |
